**Table S1** : Accessions used in this study, origin and characteristics

| Genus                        | Species                                | Accession          | Material type* | 2C DNA content (pg) | Chromosome number | Ploidy level | Genome structure | Origin               | Seed bank/herbarium |
|------------------------------|----------------------------------------|--------------------|----------------|---------------------|-------------------|--------------|------------------|----------------------|---------------------|
|                              | <i>A. afraspera</i>                    | LSTM1              | S              | 5.28 ± 0.03         | 2n=76             | 8x           | AB               | Senegal              | LSTM                |
|                              | <i>A. americana</i>                    | PI544122           | S              | 1.24 ± 0.01         | 2n=20             | 2x           |                  | Venezuela            | USDA                |
|                              | <i>A. aspera</i>                       | IRRI013020         | S              | 4.26 ± 0.04         | 2n=38             | 4x           | AB               | Sri Lanka            | IRRI                |
|                              | <i>A. ciliata</i>                      | IRRI 13078         | S              | 1.08 ± 0.02         | 2n=20             | 2x           |                  | Colombia             | IRRI                |
|                              | <i>A. crassicaulis</i>                 | LSTM13             | S              | 3.10 ± 0.03         | 2n=40             | 4x           | AB               | Senegal              | LSTM                |
|                              | <i>A. cristata</i>                     | ILRI16880          | S              | 1.92 ± 0.02         | 2n=38             | 4x           | AB               | Central African Rep. | IRRI                |
|                              | <i>A. deamii</i>                       | LSTM24             | S              | 1.93 ± 0.05         | 2n=20             | 2x           |                  | Mexico               | LSTM                |
|                              | <i>A. deightonii</i>                   | Lopez Poveda 204   | S              | 1.22 ± 0.01         | -                 | -            | -                | Sierra Leone         | RBG Kew (K)         |
|                              | <i>A. denticulata</i>                  | IRRI13003          | S              | 1.22 ± 0.01         | 2n=20             | 2x           |                  | Brazil               | IRRI                |
|                              | <i>A. evenia</i> ssp. <i>evenia</i>    | CIAT22838          | S              | 0.81 ± 0.00         | 2n=20             | 2x           |                  | Malawi               | CIAT                |
|                              | <i>A. evenia</i> ssp. <i>serrulata</i> | IRFL6945           | S              | 0.95 ± 0.01         | 2n=20             | 2x           |                  | USA                  | USDA                |
|                              | <i>A. filosa</i>                       | CIAT22466          | S              | 0.82 ± 0.01         | 2n=20             | 2x           |                  | Mexico               | CIAT                |
|                              | <i>A. fluitans</i>                     | CPI052338          | S              | 4.16 ± 0.04         | 2n=38             | 4x           | AB               | Zambia               | AusPGRIS            |
|                              | <i>A. fluminensis</i>                  | LSTM17             | S              | 1.55 ± 0.04         | 2n=20             | 2x           |                  | Brazil               | LSTM                |
|                              | <i>A. indica</i> 4x                    | PI196206           | S              | 1.71 ± 0.04         | 2n=40             | 4x           |                  | India                | USDA                |
|                              | <i>A. indica</i> 6x (Africa)           | LSTM19             | S              | 2.63 ± 0.02         | 2n=60             | 6x           |                  | Senegal              | LSTM                |
|                              | <i>A. indica</i> 6x (Australia)        | PI 257662          | S              | 2.55 ± 0.02         | 2n=60             | 6x           |                  | Australia            | USDA                |
|                              | <i>A. mediocris</i>                    | Bingham 10508      | H              | -                   | -                 | -            | -                | Zambia               | RBG Kew (K)         |
|                              | <i>A. montevidensis</i>                | LSTM131            | S              | 1.50 ± 0.02         | 2n=20             | 2x           |                  | Uruguay              | LSTM                |
| <i>Aeschynomene</i> subgenus | <i>A. nilotica</i>                     | IRRI014040         | S              | 4.11 ± 0.03         | 2n=38             | 4x           | AB               | Senegal              | IRRI                |
| <i>Aeschynomene</i>          | <i>A. paraguayensis</i>                | T.M. Pedersen 9301 | H              | -                   | -                 | -            |                  | Paraguay             | RBG Kew (K)         |
|                              | <i>A. parviflora</i>                   | IRFL02854          | S              | 1.57 ± 0.01         | 2n=20             | 2x           |                  | Colombia             | AusPGRIS            |
|                              | <i>A. pfundii</i>                      | LSTM54             | S              | 3.64 ± 0.07         | 2n=38             | 4x           | AB               | Zimbabwe             | LSTM                |
|                              | <i>A. pratensis</i>                    | IRRI13006          | S              | 3.19 ± 0.03         | 2n=40             | 4x           |                  | Brazil               | IRRI                |
|                              | <i>A. rostrata</i>                     | 600445344          | H              | -                   | -                 | -            |                  | Brazil               | CJB                 |

|                                  |                                      |               |   |             |       |    |    |              |                 |
|----------------------------------|--------------------------------------|---------------|---|-------------|-------|----|----|--------------|-----------------|
|                                  | <i>A. rudis</i>                      | LSTM56        | S | 1.03 ± 0.01 | 2n=20 | 2x |    | USA          | LSTM            |
|                                  | <i>A. scabra</i>                     | PI 296044     | S | 1.03 ± 0.03 | 2n=20 | 2x |    | Mexico       | USDA            |
|                                  | <i>A. schimperi</i> 4x               | ILRI000659    | S | 3.93 ± 0.04 | 2n=28 | 4x | AB | Tanzania     | ILRI            |
|                                  | <i>A. schimperi</i> 4x "grandiflora" | IRRI012146    | S | 4.82 ± 0.12 | 2n=28 | 4x | AB | D.R. Congo   | IRRI            |
|                                  | <i>A. schimperi</i> 8x race A        | IRRI012156    | S | 8.54 ± 0.02 | 2n=56 | 4x | AB | Senegal      | IRRI            |
|                                  | <i>A. schimperi</i> 8x race B        | ILRI013814    | S | 9.20 ± 0.12 | 2n=56 | 4x | AB | Ethiopia     | ILRI            |
|                                  | <i>A. selloi</i>                     | CPII04040     | S | 1.20 ± 0.01 | 2n=20 | 2x |    | Argentina    | CIAT            |
|                                  | <i>A. sensitiva</i>                  | LSTM28        | S | 1.37 ± 0.06 | 2n=20 | 2x |    | Senegal      | LSTM            |
|                                  | <i>A. sp</i> (328)                   | CIAT 8499     | S | 1.50 ± 0.01 | 2n=20 | 2x |    | Brazil       | CIAT            |
|                                  | <i>A. sp</i> (353)                   | AusTCFC 84952 | S | 1.91 ± 0.03 | 2n=40 | 4x |    | Mexico       | AusPGRIS        |
|                                  | <i>A. tambacoudensis</i>             | LSTM60        | S | 0.77 ± 0.02 | 2n=20 | 2x |    | Senegal      | LSTM            |
|                                  | <i>A. uniflora</i>                   | IRRI013158    | S | 2.62 ± 0.02 | 2n=40 | 4x | AB | DR. Congo    | IRRI            |
|                                  | <i>A. unijuga</i>                    | Jalisco 1952  | H | -           | -     | -  |    | Mexico       | RBG Kew (K)     |
|                                  | <i>A. villosa</i>                    | PI546550      | S | 1.23 ± 0.02 | 2n=20 | 2x |    | Mexico       | USDA            |
|                                  | <i>A. virginica</i>                  | LSTM63        | S | 2.08 ± 0.02 | 2n=20 | 2x |    | USA          | LSTM            |
| <i>Aeschynomene</i> subgenus     | <i>A. lateritia</i>                  | 8384          | H | -           | -     | -  | -  | Chad         | Cirad herbarium |
| <i>Bakerophyton</i>              | <i>A. pulchella</i>                  | 32798         | H | -           | -     | -  | -  | Mali         | Cirad herbarium |
|                                  | <i>A. abyssinica</i>                 | ILRI13761     | S | 3.98 ± 0.02 | 2n=72 | 8x | -  | Ethiopia     | ILRI            |
| <i>Aeschynomene</i> subgenus     | <i>A. abyssinica</i>                 | ILRI7705      | S | 2.06 ± 0.02 | 2n=36 | 4x | AB | Ethiopia     | ILRI            |
| <i>Rueppellia</i>                | <i>A. bella</i>                      | ILRI18422     | S | 1.47 ± 0.01 | 2n=38 | 4x | AB | Tanzania     | ILRI            |
|                                  | <i>A. heurckeana</i>                 | LSTM310       | S | 2.81 ± 0.04 | 2n=36 | 4x | -  | Madagascar   | LSTM            |
|                                  | <i>A. pygmaea</i>                    | LSTM321       | S | 6.71 ± 0.00 | 2n=76 | 8x | -  | D.R. Congo   | U. Liège        |
| <i>Aeschynomene</i> unclassified | <i>A. patula</i>                     | CPI052332     | S | 0.58 ± 0.02 | 2n=20 | 2x |    | Madagascar   | AusPGRIS        |
|                                  | <i>A. schindleri</i>                 | P001468       | H | -           | -     | -  |    | Madagascar   | MNHN            |
| <i>Bryaspis</i>                  | <i>B. humularioides</i>              | Burgt 1734    | S | 3.93 ± 0.03 | 2n=40 | 4x | AB | Sierra Leone | RBG Kew (K)     |
|                                  | <i>B. lupulina</i>                   | KG369400      | S | 2.70 ± 0.01 | 2n=40 | 4x | AB | Mali         | RBG Kew (K)     |
| <i>Cyclocarpa</i>                | <i>C. stellaris</i>                  | KG246518      | S | 1.89 ± 0.02 | 2n=28 | 4x | AB | Burkina faso | RBG Kew (K)     |
| <i>Zoicaenic</i>                 | <i>G. cristata</i>                   |               | S | 0.71 ± 0.01 | 2n=40 | 4x | AB | India        | U. Calcutta     |

|                      |                         |           |   |             |       |    |    |                      |             |
|----------------------|-------------------------|-----------|---|-------------|-------|----|----|----------------------|-------------|
| <i>Geissospermum</i> | <i>G. tenella</i>       |           | S | 0.71 ± 0.01 | 2n=40 | 4x | AB | India                | U. Calcutta |
| <i>Humularia</i>     | <i>H. descampsi</i>     | ILRI16882 | S | 3.09 ± 0.04 | -     | 4x | AB | Central African Rep. | LSTM        |
|                      | <i>H. kapiensis</i>     |           | S | 4.09 ± 0.04 | 2n=38 | 4x | AB | D.R. Congo           | U. Liège    |
| <i>Kotschya</i>      | <i>K. africana</i>      |           | S | 4.48 ± 0.01 | 2n=32 | 4x | -  | Madagascar           | LSTM        |
|                      | <i>K. lutea</i>         |           | S | 2.99 ± 0.02 | 2n=36 | 4x | AB | Guinea               | LSTM        |
|                      | <i>K. strigosa</i>      |           | S | 4.46 ± 0.04 | 2n=36 | 4x | AB | Madagascar           | LSTM        |
| <i>Smithia</i>       | <i>S. abyssinica</i>    | ILRI8360  | S | 2.21 ± 0.01 | 2n=40 | 4x | AB | Ethiopia             | ILRI        |
|                      | <i>S. sensitiva</i>     | ILRI23833 | S | 1.73 ± 0.01 | 2n=38 | 4x | AB | Papua New Guinea     | ILRI        |
| <i>Soemmeringia</i>  | <i>S. semperflorens</i> | CIAT9844  | S | 1.66 ± 0.03 | 2n=20 | 2x |    | Brazil               | CIAT        |

-: not determined

\*: S, seeds ; H, herbarium specimen
